# Supplementary material for: Durable superhydrophobic/highly oleophobic coatings from multi-dome SiO2 nanoparticles and fluoroacrylate block copolymers on flat substrates
Source: Royal Society of Chemistry journal article supplement (doi:10.1039/c5ta04428f), 2015-01-01
Supplement: c5ta04428f1.pdf [file c5ta04428f1.pdf]

## Supplementary Information

### Durable superhydrophobic/high-oleophobic coatings from multi-dome SiO<sub>2</sub> nanoparticles and fluoroacrylate block copolymers on flat substrates

Liang Junyan, Wang Li, Bao Jingxian, He Ling\*

*Department of Chemistry, School of Science, Xi'an Jiaotong University, Xi'an 710049, China*

(Fig. S1) XPS spectra of the coating surfaces and (Fig. S2) video frames of water bouncing

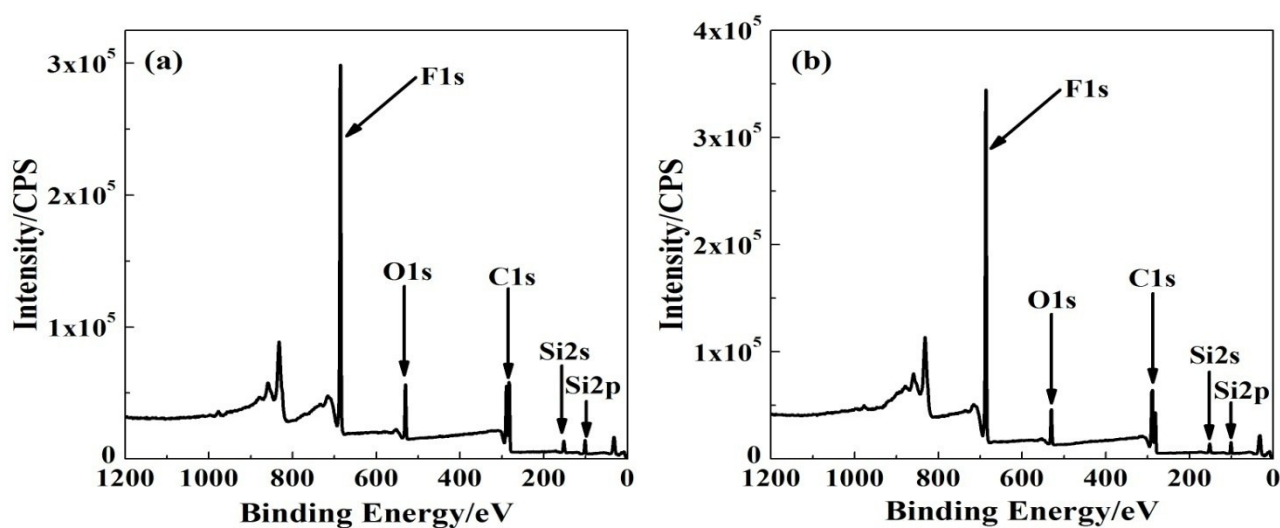

Fig. S1 The XPS spectra show that the surfaces of (fluoroalkylsilane-modified SiO<sub>2</sub> NPs)-based coatings (coatings A-D) and their corresponding (PMMA-b-PDFHM)-applied (fluoroalkylsilane-modified SiO<sub>2</sub> NPs)-based coatings have similar elemental compositions, containing carbon, oxygen, fluorine and silicon. Here, the XPS wide scanning spectra for the surfaces of Coating D (a) and (PMMA-b-PDFHM)-applied Coating D (b) along with corresponding peak assignments are presented as an example.

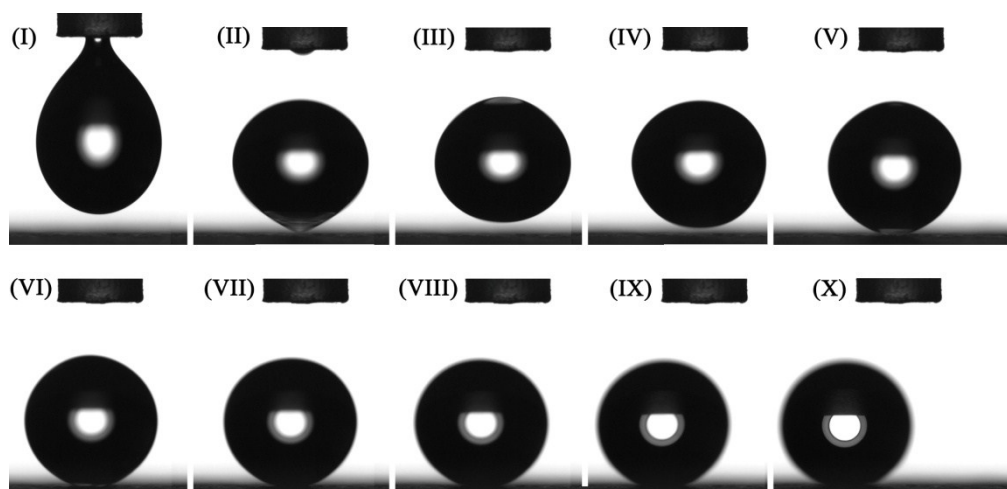

Fig. S2 Video frames (I, II, III, IV, V, VI, VII, VIII, IX, X) showing that a 9  $\mu\text{L}$  water droplet dispensed from a 2 mm height could bounce and roll off within 0.2 s after touching the surface of (PMMA-b-PDFHM)-applied (fluoroalkylsilane-modified  $\text{SiO}_2$  NPs)-based Coating D held horizontally without slanting; the time interval between two consecutive frames is 0.025s. Similarly, a 9  $\mu\text{L}$  water droplet could bounce and roll off the (PMMA-b-PDFHM)-applied (fluoroalkylsilane-modified  $\text{SiO}_2$  NPs)-based Coating C after touching the surface.
